# Supplementary material for: Time spent cycling, walking, running, standing and sedentary: a cross-sectional analysis of accelerometer-data from 1670 adults in the Copenhagen City Heart Study
Source: Springer Nature journal article supplement (doi:10.1186/s12889-019-7679-z), 2019-10-24
Supplement: MOESM2 [file 17306892]

## Additional file 2

| <b>Table A2.1.</b> Comparison of characteristics of participants consenting and not consenting to wear accelerometers in the fifth examination of the Copenhagen City Heart Study (Denmark) |                                         |                                          |
|---------------------------------------------------------------------------------------------------------------------------------------------------------------------------------------------|-----------------------------------------|------------------------------------------|
| <b>Fifth examination of the Copenhagen City Heart Study<br/>N=4543 (100.0%)</b>                                                                                                             | <b>Consenting<br/>n=2335 (51.4%)</b>    | <b>Non-consenting<br/>n=2208 (48.6%)</b> |
| <b>Characteristics</b>                                                                                                                                                                      | <b>n (%) [95% CI] / Median [95% CI]</b> | <b>n (%) [95% CI] / Median [95% CI]</b>  |
| Sex distribution                                                                                                                                                                            | 2335 (100.0)                            | 2208 (100.0)                             |
| Women                                                                                                                                                                                       | 1330 (56.96) [54.92-58.98]              | 1,233 (55.84) [53.74-57.92]              |
| Men                                                                                                                                                                                         | 1005 (43.04) [41.02-45.08]              | 975 (44.16) [42.08-46.26]                |
| Age                                                                                                                                                                                         | 2335 (100.0)                            | 2208 (100.0)                             |
| Median years                                                                                                                                                                                | 56.12 [55.30-57.07]                     | 57.34 [56.40-58.83]                      |
| Age group (years)                                                                                                                                                                           | 2335 (100.0)                            | 2208 (100.0)                             |
| 20-<35                                                                                                                                                                                      | 463 (19.83) [18.24-21.52]               | 403 (18.25) [16.67-19.94]                |
| 35-<50                                                                                                                                                                                      | 383 (16.40) [14.94-17.98]               | 369 (16.71) [15.19-18.35]                |
| 50-<65                                                                                                                                                                                      | 787 (33.70) [31.79-35.67]               | 672 (30.43) [28.53-32.41]                |
| 65-<75                                                                                                                                                                                      | 512 (21.93) [20.28-23.67]               | 457 (20.70) [19.04-22.46]                |
| ≥75                                                                                                                                                                                         | 190 (8.14) [7.08-9.34]*                 | 307 (13.90) [12.50-15.43]*               |
| BMI                                                                                                                                                                                         | 2332 (99.87)                            | 2116 (95.83)                             |
| Median (kg/m <sup>2</sup> )                                                                                                                                                                 | 25.12 [24.94-25.29]                     | 25.14 [24.97-25.40]                      |
| BMI, WHO classification                                                                                                                                                                     | 2332 (99.87)                            | 2116 (95.83)                             |
| Underweight                                                                                                                                                                                 | 24 (1.03) [0.68-1.55]                   | 37 (1.75) [1.25-2.43]                    |
| Normal                                                                                                                                                                                      | 1135 (48.67) [46.62-50.72]              | 1020 (48.20) [46.06-50.36]               |
| Overweight                                                                                                                                                                                  | 860 (36.88) [34.92-38.88]               | 724 (34.22) [32.20-36.29]                |
| Obese                                                                                                                                                                                       | 337 (14.45) [13.06-15.96]*              | 372 (17.58) [15.99-19.29]*               |
| WHR                                                                                                                                                                                         | 2325 (99.57)                            | 2109 (95.52)                             |
| Median WHR                                                                                                                                                                                  | 0.876 [0.870-0.880]                     | 0.88 [0.876-0.886]                       |
| Level of education                                                                                                                                                                          | 2327 (99.66)                            | 2191 (99.23)                             |
| No [further] education                                                                                                                                                                      | 269 (11.56) [10.30-12.95]*              | 321 (14.65) [13.21-16.22]*               |
| Short education (up to 3 years)                                                                                                                                                             | 228 (9.80) [8.64-11.10]                 | 230 (10.50) [9.26-11.87]                 |
| Vocational or comparable education (1-3 years)                                                                                                                                              | 567 (24.37) [22.64-26.17]               | 532 (24.28) [22.51-26.14]                |
| Higher education (≥3 years)                                                                                                                                                                 | 580 (24.92) [23.19-26.74]*              | 467 (21.31) [19.63-23.10]*               |
| University education                                                                                                                                                                        | 683 (29.35) [27.52-31.26]               | 641 (29.26) [27.37-31.22]                |
| Longest type of occupation since completion of education                                                                                                                                    | 2325 (99.57)                            | 2188 (99.09)                             |
| Self-employed                                                                                                                                                                               | 214 (9.20) [8.08-10.47]                 | 244 (11.15) [9.88-12.56]                 |
| Skilled/trained                                                                                                                                                                             | 467 (20.09) [18.49-21.79]               | 417 (19.06) [17.45-20.78]                |
| Unskilled                                                                                                                                                                                   | 226 (9.72) [8.56-11.01]                 | 251 (11.47) [10.18-12.90]                |
| "White-collar"/non-manual worker                                                                                                                                                            | 1194 (51.35) [49.30-53.40]*             | 1031 (47.12) [45.01-49.24]*              |
| Housewife/house husband                                                                                                                                                                     | 24 (1.03) [0.68-1.56]*                  | 54 (2.47) [1.88-3.23]*                   |
| Student                                                                                                                                                                                     | 148 (6.37) [5.42-7.45]                  | 127 (5.80) [4.88-6.89]                   |
| Unemployed/retired                                                                                                                                                                          | 52 (2.24) [1.69-2.95]                   | 64 (2.93) [2.28-3.74]                    |
| Household income (before tax)                                                                                                                                                               | 2284 (97.82)                            | 2123 (96.15)                             |
| <100,000 DKK                                                                                                                                                                                | 92 (4.03) [3.28-4.94]                   | 115 (5.42) [4.51-6.49]                   |
| 100,000 – 200,000 DKK                                                                                                                                                                       | 423 (18.52) [16.96-20.19]               | 454 (21.38) [19.67-23.20]                |
| 200,000 – 400,000 DKK                                                                                                                                                                       | 614 (26.88) [25.08-28.76]               | 588 (27.70) [25.81-29.66]                |
| 400,000 – 600,000 DKK                                                                                                                                                                       | 406 (17.78) [16.24-19.42]               | 337 (15.87) [14.36-17.51]                |
| 600,000 – 800,000 DKK                                                                                                                                                                       | 318 (13.92) [12.54-15.43]               | 244 (11.49) [10.18-12.94]                |
| >800,000 DKK                                                                                                                                                                                | 431 (18.87) [17.30-20.55]               | 385 (18.13) [16.53-19.86]                |
| Current civil status/marital status                                                                                                                                                         | 2325 (99.57)                            | 2185 (98.96)                             |
| Married/cohabiting                                                                                                                                                                          | 1402 (60.30) [58.28-62.29]*             | 1224 (56.02) [53.91-58.11]*              |
| Unmarried                                                                                                                                                                                   | 464 (19.96) [18.36-21.65]               | 448 (20.50) [18.84-22.27]                |
| Separated/divorced                                                                                                                                                                          | 263 (11.31) [10.07-12.69]               | 239 (10.94) [9.68-12.34]                 |
| Widow/widower                                                                                                                                                                               | 196 (8.43) [7.35-9.65]*                 | 274 (12.54) [11.20-14.02]*               |
| Occupational physical activity                                                                                                                                                              | 1563 (66.94)                            | 1362 (61.68)                             |
| Mainly sedentary work                                                                                                                                                                       | 680 (43.51) [41.04-46.01]               | 643 (47.21) [44.53-49.90]                |
| Sitting or standing, from time to time walking                                                                                                                                              | 549 (35.12) [32.77-37.56]               | 461 (33.85) [31.35-36.44]                |
| Walking, from time to time lifting                                                                                                                                                          | 296 (18.94) [17.04-20.99]               | 232 (17.03) [15.10-19.16]                |
| Heavy physical work/manual work                                                                                                                                                             | 38 (2.43) [1.75-3.36]                   | 26 (1.91) [1.28-2.83]                    |
| Leisure time physical activity                                                                                                                                                              | 2312 (99.01)                            | 2152 (97.46)                             |
| Being almost completely inactive or active in light physical activity for <2 h/week                                                                                                         | 138 (5.97) [5.05-7.03]*                 | 247 (11.48) [10.18-12.92]*               |
| Light physical activity for 2-4 h/week                                                                                                                                                      | 909 (39.32) [37.32-41.35]               | 856 (39.78) [37.71-41.88]                |
| Light physical activity for >4 h/week or more strenuous physical activity 2-4 h/week                                                                                                        | 1089 (47.10) [45.05-49.16]*             | 880 (40.89) [38.81-43.01]*               |
| More strenuous physical activity for >4 h/week or regular hard physical exercise and possibly competitions several times a week                                                             | 176 (7.61) [6.58-8.79]                  | 169 (7.85) [6.77-9.09]                   |

**Table A2.1. (Continued)**

|                                      |                            |                            |
|--------------------------------------|----------------------------|----------------------------|
| Self-rated fitness compared to peers | 2323 (99.49)               | 2176 (98.55)               |
| Same                                 | 1104 (47.52) [45.48-49.58] | 993 (45.63) [43.53-47.76]  |
| Better                               | 864 (37.19) [35.23-39.20]  | 730 (33.55) [31.57-35.58]  |
| Worse                                | 355 (15.28) [13.86-16.82]* | 453 (20.82) [19.14-22.60]* |
| Smoking status                       | 2292 (98.16)               | 2152 (97.46)               |
| Current smoker                       | 415 (18.11) [16.56-19.76]  | 431 (20.03) [18.37-21.80]  |
| Previous smoker                      | 971 (42.36) [40.33-44.42]  | 897 (41.68) [39.59-43.80]  |
| Non-smoker                           | 906 (39.53) [37.52-41.57]  | 824 (38.29) [36.24-40.39]  |
| Systolic blood pressure              | 2314 (99.10)               | 2090 (94.66)               |
| Median (mmHg)                        | 134.00 [133.00-135.00]     | 135.00 [134.0-136.5]       |
| Blood pressure classification        | 2314 (99.10)               | 2090 (94.66)               |
| Normal                               | 1361 (58.82) [56.78-60.83] | 1165 (55.74) [53.58-57.88] |
| Grade 1 hypertension                 | 760 (32.84) [30.94-34.81]  | 685 (32.78) [30.77-34.84]  |
| Grade 2 hypertension                 | 152 (6.57) [5.61-7.67]     | 186 (8.90) [7.73-10.22]    |
| Grade 3 hypertension                 | 41 (1.77) [1.29-2.42]      | 54 (2.58) [1.96-3.38]      |
| Self-reported general health         | 2322 (99.44)               | 2182 (98.82)               |
| Excellent                            | 211 (9.09) [7.96-10.35]    | 206 (9.44) [8.26-10.76]    |
| Very good                            | 751 (32.34) [30.45-34.30]  | 624 (28.60) [26.72-30.55]  |
| Good                                 | 992 (42.72) [40.70-44.77]  | 886 (40.60) [38.54-42.70]  |
| Less good                            | 318 (13.70) [12.34-15.18]* | 384 (17.60) [16.04-19.28]* |
| Poor                                 | 50 (2.15) [1.62-2.85]*     | 82 (3.76) [3.02-4.67]*     |

The non-consenting group includes 191 individuals with missing information on whether they agreed to wear accelerometers or not.

*N/n*, number of observations

CI, confidence interval, CIs were calculated using the Wilson score method for proportions and the normal approximation method for medians.

\* indicate non-overlapping CIs between the groups.

BMI, body mass index

WHR, waist-hip-ratio

DKK, Danish kroner

Blood pressure classification is based on the 2013 European Society of Hypertension/European Society of Cardiology guidelines for the management of arterial hypertension.

The normal category includes high normal.

**Table A2.2.** Comparison of characteristics of participants in the fifth examination of the Copenhagen City Heart Study (Denmark) fulfilling and not fulfilling inclusion criteria ( $\geq 5$  days with  $\geq 16$ h/day) with regards to the length of accelerometer measurements

| Participants with available accelerometer data<br>N=2032 (100.0%)                                                               | Eligible<br>n=1670 (82.2%)       | Non-eligible<br>n=362 (17.8%)    |
|---------------------------------------------------------------------------------------------------------------------------------|----------------------------------|----------------------------------|
| Characteristic                                                                                                                  | n (%) [95% CI] / Median [95% CI] | n (%) [95% CI] / Median [95% CI] |
| Sex distribution                                                                                                                | 1670 (100.0)                     | 362 (100.0)                      |
| Women                                                                                                                           | 958 (57.37) [54.95-59.75]        | 215 (59.39) [54.12-64.46]        |
| Men                                                                                                                             | 712 (42.60) [40.25-45.05]        | 147 (40.61) [35.54-45.88]        |
| Age                                                                                                                             | 1670 (100.0)                     | 362 (100.0)                      |
| Median years                                                                                                                    | 58.05 [57.21-59.02]*             | 46.34 [41.33-49.82]*             |
| Age group (years)                                                                                                               | 1670 (100.0)                     | 362 (100.0)                      |
| 20-<35                                                                                                                          | 261 (15.63) [13.94-17.48]*       | 134 (37.01) [32.07-42.24]*       |
| 35-<50                                                                                                                          | 265 (15.90) [14.17-17.73]        | 68 (18.78) [14.97-23.28]         |
| 50-<65                                                                                                                          | 584 (34.97) [32.69-37.32]*       | 98 (27.07) [22.62-32.01]*        |
| 65-<75                                                                                                                          | 403 (24.13) [22.11-26.27]*       | 45 (12.43) [9.30-16.38]*         |
| $\geq 75$                                                                                                                       | 157 (9.40) [8.07-10.93]*         | 17 (4.7) [2.85-7.56]*            |
| BMI                                                                                                                             | 1668 (99.88)                     | 361 (99.72)                      |
| Median (kg/m <sup>2</sup> )                                                                                                     | 25.16 [24.87-25.39]              | 25.02 [24.35-25.41]              |
| BMI, WHO classification                                                                                                         | 1668 (99.88)                     | 361 (99.72)                      |
| Underweight                                                                                                                     | 15 (0.90) [0.52-1.52]            | 5 (1.39) [0.51-3.39]             |
| Normal                                                                                                                          | 811 (48.80) [46.38-51.23]        | 180 (49.86) [44.60-55.13]        |
| Overweight                                                                                                                      | 620 (37.17) [34.85-39.55]        | 136 (37.67) [32.70-42.92]        |
| Obese                                                                                                                           | 234 (14.0) [12.42-15.81]         | 45 (12.47) [9.33-16.43]          |
| WHR                                                                                                                             | 1664 (99.64)                     | 360 (99.45)                      |
| Median WHR                                                                                                                      | 0.878 [0.872-0.883]              | 0.852 [0.843-0.875]              |
| Level of education                                                                                                              | 1664 (99.64)                     | 362 (100.0)                      |
| No [further] education                                                                                                          | 190 (11.41) [9.95-13.07]         | 34 (9.39) [6.68-12.99]           |
| Short education (up to 3 years)                                                                                                 | 178 (10.70) [9.27-12.31]         | 24 (6.63) [4.38-9.84]            |
| Vocational or comparable education (1-3 years)                                                                                  | 423 (25.42) [23.36-27.60]        | 80 (22.1) [18.00-26.80]          |
| Higher education ( $\geq 3$ years)                                                                                              | 419 (25.18) [23.12-27.35]        | 97 (26.80) [22.36-31.73]         |
| University education                                                                                                            | 454 (27.28) [25.17-29.50]*       | 127 (35.08) [30.21-40.27]*       |
| Longest type of occupation since completion of education                                                                        | 1664 (99.64)                     | 361 (99.72)                      |
| Self-employed                                                                                                                   | 158 (9.50) [8.15-11.03]          | 26 (7.20) [4.84-10.50]           |
| Skilled/trained                                                                                                                 | 341 (20.49) [18.59-22.53]        | 71 (19.67) [15.77-24.23]         |
| Unskilled                                                                                                                       | 161 (9.68) [8.32-11.22]          | 31 (8.59) [6.00-12.09]           |
| "White-collar"/non-manual worker                                                                                                | 863 (51.86) [49.43-54.29]        | 179 (49.58) [44.32-54.86]        |
| Housewife/house husband                                                                                                         | 21 (1.26) [0.80-1.96]            | 2 (0.55) [0.10-2.21]             |
| Student                                                                                                                         | 86 (5.17) [4.18-6.37]*           | 39 (10.80) [7.88-14.58]*         |
| Unemployed/retired                                                                                                              | 34 (2.04) [1.44-2.88]            | 13 (3.60) [2.01-6.23]            |
| Household income (before tax)                                                                                                   | 1635 (97.90)                     | 357 (98.62)                      |
| <100,000 DKK                                                                                                                    | 60 (3.67) [2.83-4.73]            | 15 (4.20) [2.46-6.99]            |
| 100,000 – 200,000 DKK                                                                                                           | 304 (18.59) [16.75-20.58]        | 57 (15.97) [12.41-20.28]         |
| 200,000 – 400,000 DKK                                                                                                           | 469 (28.69) [26.51-30.96]        | 87 (24.37) [20.07-29.23]         |
| 400,000 – 600,000 DKK                                                                                                           | 287 (17.55) [15.76-19.50]        | 64 (17.93) [14.17-22.39]         |
| 600,000 – 800,000 DKK                                                                                                           | 221 (13.52) [11.92-15.29]        | 63 (17.65) [13.92-22.09]         |
| >800,000 DKK                                                                                                                    | 294 (17.98) [16.17-19.95]        | 71 (19.89) [15.95-24.49]         |
| Current civil status/marital status                                                                                             | 1665 (99.70)                     | 360 (99.45)                      |
| Married/cohabiting                                                                                                              | 1008 (60.54) [58.14-62.89]       | 217 (60.28) [55.00-65.33]        |
| Unmarried                                                                                                                       | 307 (18.44) [16.62-20.40]*       | 92 (25.56) [21.19-30.45]*        |
| Separated/divorced                                                                                                              | 202 (12.13) [10.62-13.82]        | 34 (9.44) [6.72-13.06]           |
| Widow/widower                                                                                                                   | 148 (8.89) [7.59-10.38]          | 17 (4.72) [2.86-7.60]            |
| Occupational physical activity                                                                                                  | 1,070 (64.07)                    | 282 (77.90)                      |
| Mainly sedentary work                                                                                                           | 435 (40.65) [37.70-43.67]*       | 151 (53.55) [47.54-59.45]*       |
| Sitting/standing, from time to time walking                                                                                     | 395 (36.92) [34.03-39.90]*       | 76 (26.95) [21.94-32.60]*        |
| Walking, from time to time lifting                                                                                              | 215 (20.09) [17.76-22.65]        | 48 (17.02) [12.93-22.04]         |
| Heavy physical work/manual work                                                                                                 | 25 (2.34) [1.55-3.48]            | 7 (2.48) [1.09-5.27]             |
| Leisure time physical activity                                                                                                  | 1655 (99.10)                     | 360 (99.45)                      |
| Being almost completely inactive or active in light physical activity for <2 h/week                                             | 104 (6.28) [5.19-7.59]           | 19 (5.28) [3.29-8.26]            |
| Light physical activity for 2-4 h/week                                                                                          | 665 (40.18) [37.81-42.59]        | 137 (38.06) [33.06-43.31]        |
| Light physical activity for >4 h/week or more strenuous physical activity 2-4 h/week                                            | 784 (47.37) [44.94-49.81]        | 163 (45.28) [40.08-50.58]        |
| More strenuous physical activity for >4 h/week or regular hard physical exercise and possibly competitions several times a week | 102 (6.16) [5.08-7.46]*          | 41 (11.39) [8.39-15.24]*         |
| Self-rated fitness compared to peers                                                                                            | 1664 (99.64)                     | 360 (99.45)                      |
| Same                                                                                                                            | 793 (47.66) [45.23-50.09]        | 168 (46.67) [41.44-51.97]        |
| Better                                                                                                                          | 612 (36.78) [34.47-39.15]        | 135 (37.50) [32.52-42.75]        |
| Worse                                                                                                                           | 259 (15.56) [13.87-17.42]        | 57 (15.83) [12.30-20.11]         |

**Table A2.2.** (Continued)

|                                                                                                                                                                                                                                                                                                                                                                                                                                                                                                                                                              |                            |                            |
|--------------------------------------------------------------------------------------------------------------------------------------------------------------------------------------------------------------------------------------------------------------------------------------------------------------------------------------------------------------------------------------------------------------------------------------------------------------------------------------------------------------------------------------------------------------|----------------------------|----------------------------|
| Smoking status                                                                                                                                                                                                                                                                                                                                                                                                                                                                                                                                               | 1639 (98.14)               | 358 (98.90)                |
| Current smoker                                                                                                                                                                                                                                                                                                                                                                                                                                                                                                                                               | 286 (17.45) [15.66-19.39]  | 61 (17.04) [13.37-21.43]   |
| Previous smoker                                                                                                                                                                                                                                                                                                                                                                                                                                                                                                                                              | 729 (44.48) [42.06-46.92]* | 125 (34.92) [30.03-40.13]* |
| Non-smoker                                                                                                                                                                                                                                                                                                                                                                                                                                                                                                                                                   | 624 (38.07) [35.72-40.48]* | 172 (48.04) [42.78-53.35]* |
| Systolic blood pressure                                                                                                                                                                                                                                                                                                                                                                                                                                                                                                                                      | 1656 (99.16)               | 359 (99.17)                |
| Median (mmHg)                                                                                                                                                                                                                                                                                                                                                                                                                                                                                                                                                | 135.00 (134.00-136.50)*    | 129.50 (127.0-131.50)*     |
| Blood pressure classification                                                                                                                                                                                                                                                                                                                                                                                                                                                                                                                                | 1656 (99.16)               | 359 (99.17)                |
| Normal                                                                                                                                                                                                                                                                                                                                                                                                                                                                                                                                                       | 945 (57.07) [54.64-59.46]* | 248 (69.08) [63.98-73.77]* |
| Grade 1 hypertension                                                                                                                                                                                                                                                                                                                                                                                                                                                                                                                                         | 567 (34.24) [31.96-33.59]* | 95 (26.46) [22.04-31.40]*  |
| Grade 2 hypertension                                                                                                                                                                                                                                                                                                                                                                                                                                                                                                                                         | 112 (6.76) [5.62-8.10]     | 14 (3.90) [2.23-6.61]      |
| Grade 3 hypertension                                                                                                                                                                                                                                                                                                                                                                                                                                                                                                                                         | 32 (1.93) [1.347-2.750]    | 2 (0.56) [0.097-2.221]     |
| Self-reported general health                                                                                                                                                                                                                                                                                                                                                                                                                                                                                                                                 | 1662 (99.52)               | 359 (99.17)                |
| Excellent                                                                                                                                                                                                                                                                                                                                                                                                                                                                                                                                                    | 139 (8.36) [7.10-9.82]     | 34 (9.47) [6.74-13.10]     |
| Very good                                                                                                                                                                                                                                                                                                                                                                                                                                                                                                                                                    | 532 (32.01) [29.78-34.32]  | 123 (34.26) [29.41-39.46]  |
| Good                                                                                                                                                                                                                                                                                                                                                                                                                                                                                                                                                         | 716 (43.08) [40.69-45.50]  | 141 (39.28) [34.23-44.56]  |
| Less good                                                                                                                                                                                                                                                                                                                                                                                                                                                                                                                                                    | 242 (14.56) [12.92-16.37]  | 49 (13.65) [10.36-17.74]   |
| Poor                                                                                                                                                                                                                                                                                                                                                                                                                                                                                                                                                         | 33 (1.986) [1.392-2.810]   | 12 (3.34) [1.82-5.92]      |
| <p><i>N/n</i>, number of observations<br/> CI, confidence interval, CIs were calculated using the Wilson score method for proportions and the normal approximation method for medians.<br/> * indicate non-overlapping CIs between the groups.<br/> BMI, body mass index<br/> WHR, waist-hip-ratio<br/> DKK, Danish krone<br/> Blood pressure classification is based on the 2013 European Society of Hypertension/European Society of Cardiology guidelines for the management of arterial hypertension.<br/> The normal category includes high normal.</p> |                            |                            |
