# Supplementary material for: Time spent cycling, walking, running, standing and sedentary: a cross-sectional analysis of accelerometer-data from 1670 adults in the Copenhagen City Heart Study
Source: Springer Nature journal article supplement (doi:10.1186/s12889-019-7679-z), 2019-10-24
Supplement: MOESM3 [file 17306892]

## Additional file 3

**Table A3.1.** Time spent in physical activity types, stationary behaviours and number of steps/day among 1670 adult Copenhageners (Denmark) participating in the fifth examination of the Copenhagen City Heart Study stratified by sex

| Behaviour, min/day                                    | Women<br><i>n</i> =958<br>Median (Q1-Q3)<br>[95% CI] | Men<br><i>n</i> =712<br>Median (Q1-Q3)<br>[95% CI] | <i>P</i> |
|-------------------------------------------------------|------------------------------------------------------|----------------------------------------------------|----------|
| Time in bed                                           | 484.29 (451.07-521.67)<br>[479.00-488.76]            | 475.00 (440.00-515.52)<br>[469.29-479.17]          | <0.001   |
| Sedentary behaviour                                   | 563.82 (491.7-626.26)<br>[555.36-573.01]             | 595.39 (532.15-670.10)<br>[589.57-605.61]          | <0.001   |
| Standing                                              | 192.14 (154.42-236.04)<br>[187.25-196.7]             | 169.11 (127.60-211.11)<br>[163.20-175.15]          | <0.001   |
| Moving                                                | 70.31 (54.01-88.89)<br>[67.94-72.18]                 | 67.10 (52.48-85.74)<br>[64.48-69.06]               | 0.077    |
| Walking                                               | 84.26 (64.98-107.41)<br>[81.89-87.29]                | 80.16 (61.01-105.3)<br>[76.78-83.28]               | 0.013    |
| Walking slow                                          | 18.05 (12.33-25.31)<br>[17.27-18.61]                 | 22.40 (14.70-32.56)<br>[21.12-23.41]               | <0.001   |
| Walking fast                                          | 59.40 (44.00-78.65)<br>[57.45-61.17]                 | 50.02 (36.14-68.47)<br>[47.86-52.13]               | <0.001   |
| Climbing stairs (up/down)                             | 4.40 (2.44-6.80)<br>[4.11-4.61]                      | 4.32 (2.24-6.8)<br>[3.88-4.66]                     | 0.670    |
| Number of steps/day                                   | 9482.75 (7195.77-12179.52)<br>[9213.33-9900.33]      | 8952.75 (6657.55-11720.79)<br>[8581.00-9378.67]    | 0.002    |
| LIPA                                                  | 90.31 (70.37-112.33)<br>[87.44-93.43]                | 92.25 (71.60-115.92)<br>[88.85-95.05]              | 0.140    |
| Cycling                                               | 1.67 (0.00-13.22)<br>[0.78-2.44]                     | 0.69 (0.00-9.73)<br>[0.23-1.87]                    | 0.082    |
| Cycling, among those cycling >0 min/day<br>Prevalence | 8.77 (2.50-19.18)<br>[7.73-10.23]<br>62.11%          | 7.54 (2.48-17.11)<br>[6.27-9.08]<br>59.13%         | 0.170    |
| Running                                               | 0.11 (0.04-0.42)<br>[0.10-0.14]                      | 0.14 (0.04-0.51)<br>[0.11-0.16]                    | 0.110    |
| Running, among those running >10 s/day<br>Prevalence  | 0.57 (0.26-3.60)<br>[0.47-0.75]<br>42.80%            | 0.71 (0.29-4.79)<br>[0.51-1.00]<br>45.08%          | 0.091    |
| MVPA                                                  | 75.66 (53.48-97.23)<br>[72.37-78.25]                 | 65.43 (45.4-86.32)<br>[62.03-68.15]                | <0.001   |

All estimates are in min/day except for number of steps/day that is presented in number of steps taken per day.

*n*, number of observations

Q1-Q3, first and third quartile

CI, confidence interval

*P*, p-value from Kruskal-Wallis rank sum test used to test for differences between sex.

Moving consists of small movements without regular walking during a standing posture.

Walk slow and fast corresponds to walking <100 and ≥100 steps/min, respectively.

Prevalence refers to the prevalence of cycling >0 min/day and running >10 s/day (on average), respectively.

s, seconds

LIPA, light intensity physical activity

MVPA, moderate-to-vigorous physical activity

**Table A3.2.** Time spent in physical activity types, stationary behaviours and number of steps/day among 1670 adult Copenhageners (Denmark) participating in the fifth examination of the Copenhagen City Heart Study stratified by age

| Behaviour, min/day                      | 20-<35 yrs.<br><i>n</i> =196<br>Median (Q1-Q3)<br>[95% CI] | 35-<50 yrs.<br><i>n</i> =250<br>Median (Q1-Q3)<br>[95% CI] | 50-<65 yrs.<br><i>n</i> =522<br>Median (Q1-Q3)<br>[95% CI] | 65-<75 yrs.<br><i>n</i> =431<br>Median (Q1-Q3)<br>[95% CI] | ≥75 yrs.<br><i>n</i> =271<br>Median (Q1-Q3)<br>[95% CI] | <i>P</i> |
|-----------------------------------------|------------------------------------------------------------|------------------------------------------------------------|------------------------------------------------------------|------------------------------------------------------------|---------------------------------------------------------|----------|
| Time in bed                             | 498.25 (462.34-536.21)<br>[486.43-506.60]                  | 467.32 (437.63-496.28)<br>[460.17-475.00]                  | 471.55 (437.16-506.21)<br>[466.00-475.83]                  | 485.17 (452.92-524.17)<br>[475.00-492.14]                  | 497.50 (459.79-541.32)<br>[489.17-509.17]               | <0.001   |
| Sedentary behaviour                     | 571.74 (508.80-623.81)<br>[552.50-587.59]                  | 556.09 (485.02-619.21)<br>[536.86-578.23]                  | 575.32 (502.19-642.74)<br>[561.58-583.94]                  | 588.34 (526.30-655.78)<br>[575.91-597.42]                  | 598.29 (523.60-672.41)<br>[580.00-613.96]               | <0.001   |
| Standing                                | 171.58 (143.59-210.87)<br>[163.36-179.71]                  | 197.32 (161.23-235.05)<br>[190.91-204.06]                  | 186.45 (145.33-232.94)<br>[180.08-193.21]                  | 176.12 (133.81-218.16)<br>[169.33-184.09]                  | 175.57 (133.54-228.57)<br>[165.15-184.00]               | <0.001   |
| Moving                                  | 60.56 (48.97-74.30)<br>[56.64-64.36]                       | 72.03 (58.73-90.62)<br>[67.99-76.89]                       | 72.23 (54.68-91.87)<br>[69.66-74.67]                       | 69.69 (54.06-89.20)<br>[66.96-73.70]                       | 63.97 (48.67-83.79)<br>[61.66-67.18]                    | <0.001   |
| Walking                                 | 81.90 (64.99-100.59)<br>[77.87-85.67]                      | 92.92 (75.95-117.64)<br>[87.76-98.13]                      | 90.40 (70.51-110.90)<br>[87.06-94.26]                      | 80.33 (60.29-105.5)<br>[76.39-83.40]                       | 62.76 (43.26-83.88)<br>[57.84-67.09]                    | <0.001   |
| Walking slow                            | 14.24 (9.81-20.42)<br>[13.05-16.34]                        | 19.14 (13.57-26.78)<br>[18.26-20.71]                       | 20.95 (14.91-29.26)<br>[20.11-22.31]                       | 20.87 (14.57-31.48)<br>[19.71-22.82]                       | 18.38 (11.77-28.45)<br>[16.81-20.56]                    | <0.001   |
| Walking fast                            | 59.14 (46.05-73.85)<br>[55.47-63.02]                       | 66.13 (51.63-82.06)<br>[62.54-69.63]                       | 60.27 (45.13-80.26)<br>[58.12-64.17]                       | 51.59 (36.40-70.86)<br>[48.28-54.07]                       | 38.06 (24.77-52.53)<br>[34.75-41.46]                    | <0.001   |
| Climbing stairs (up/down)               | 5.22 (3.75-7.69)<br>[4.85-5.74]                            | 5.58 (3.90-7.80)<br>[5.19-6.08]                            | 4.75 (2.93-7.36)<br>[4.50-5.07]                            | 3.56 (1.97-6.35)<br>[3.27-3.86]                            | 2.21 (0.90-4.10)<br>[1.80-2.49]                         | <0.001   |
| Number of steps/day                     | 9546.83<br>(7661.73-11870.25)<br>[8960.00-10168.71]        | 10573.08<br>(8737.17-13565.25)<br>[10202.67-11239.86]      | 10232.33<br>(7841.29-12527.29)<br>[9776.00-10510.17]       | 8708.5<br>(6521.42-11507.00)<br>[8309.00-9176.33]          | 6647.29<br>(4587.83-9201.00)<br>[6222.00-7200.67]       | <0.001   |
| LIPA                                    | 76.73 (61.32-93.73)<br>[71.26-80.43]                       | 92.66 (74.66-116.38)<br>[89.19-98.74]                      | 95.41 (75.3-118.59)<br>[91.99-99.83]                       | 95.28 (74.98-116.57)<br>[91.68-98.88]                      | 84.82 (63.98-108.87)<br>[80.33-92.02]                   | <0.001   |
| Cycling                                 | 13.49 (2.86-22.05)<br>[9.63-15.83]                         | 4.82 (0.10-15.36)<br>[2.93-7.85]                           | 2.45 (0.00-12.70)<br>[0.78-3.68]                           | 0.00 (0.00-5.38)<br>[0.00-0.15]                            | 0.00 (0.00-1.77)<br>[0.00-0.00]                         | <0.001   |
| Cycling, among those cycling >0 min/day | 15.60 (5.57-23.69)<br>[13.37-17.53]                        | 9.61 (2.61-17.87)<br>[7.39-12.79]                          | 8.55 (3.10-19.16)<br>[7.18-10.37]                          | 5.41 (1.60-12.65)<br>[3.95-6.91]                           | 3.00 (0.68-10.43)<br>[2.24-4.53]                        | <0.001   |
| Prevalence                              | 87.24%                                                     | 77.60%                                                     | 63.60%                                                     | 49.88%                                                     | 38.38%                                                  |          |
| Running                                 | 0.50 (0.17-4.62)<br>[0.38-1.09]                            | 0.34 (0.11-3.44)<br>[0.25-0.44]                            | 0.15 (0.05-0.45)<br>[0.12-0.18]                            | 0.07 (0.02-0.19)<br>[0.06-0.08]                            | 0.04 (0.01-0.11)<br>[0.03-0.05]                         | <0.001   |
| Running, among those running >10 s/day  | 1.70 (0.39-6.02)<br>[0.98-2.87]                            | 1.32 (0.36-6.90)<br>[0.82-2.48]                            | 0.53 (0.26-3.76)<br>[0.36-0.80]                            | 0.46 (0.24-1.05)<br>[0.35-0.59]                            | 0.34 (0.26-0.52)<br>[0.28-0.45]                         | <0.001   |
| Prevalence                              | 76.02%                                                     | 66.00%                                                     | 47.32%                                                     | 27.61%                                                     | 18.82%                                                  |          |
| MVPA                                    | 82.26 (67.69-100.75)<br>[78.59-86.77]                      | 85.50 (69.89-106.05)<br>[82.26-90.39]                      | 76.53 (57.15-96.90)<br>[72.62-79.71]                       | 62.69 (42.98-85.01)<br>[58.53-66.03]                       | 43.93 (28.24-60.78)<br>[39.30-48.42]                    | <0.001   |

All estimates are in min/day except for number of steps/day that is presented in number of steps taken per day.

yrs., years

*n*, number of observations

Q1-Q3, first and third quartile

CI, confidence interval

*P*, p-value from Kruskal-Wallis rank sum test used to test for differences between age groups.

Moving consists of small movements without regular walking during a standing posture.

Walk slow and fast corresponds to walking <100 and ≥100 steps/min, respectively.

Prevalence refers to the prevalence of cycling >0 min/day and running >10 s/day (on average), respectively.

s, seconds

LIPA, light intensity physical activity

MVPA, moderate-to-vigorous physical activity

**Table A3.3.** Time spent in physical activity types, stationary behaviours and number of steps/day among 1664 adult Copenhageners (Denmark) participating in the fifth examination of the Copenhagen City Heart Study stratified by level of education

| Behaviour, min/day                                    | No further education<br><i>n</i> =190<br>Median (Q1-Q3)<br>[95% CI] | Short education (≤3 yrs. w. books)<br><i>n</i> =178<br>Median (Q1-Q3)<br>[95% CI] | Vocational education (1-3 yrs.)<br><i>n</i> =423<br>Median (Q1-Q3)<br>[95% CI] | Higher education (≥3 yrs.)<br><i>n</i> =419<br>Median (Q1-Q3)<br>[95% CI] | University education<br><i>n</i> =454<br>Median (Q1-Q3)<br>[95% CI] | <i>P</i> |
|-------------------------------------------------------|---------------------------------------------------------------------|-----------------------------------------------------------------------------------|--------------------------------------------------------------------------------|---------------------------------------------------------------------------|---------------------------------------------------------------------|----------|
| Time in bed                                           | 490.25 (449.92-535.96)<br>[478.33-501.00]                           | 483.75 (448.38-523.92)<br>[470.00-495.00]                                         | 476.67 (438.25-522.17)<br>[470.83-485.00]                                      | 478.33 (449.71-513.78)<br>[472.43-483.00]                                 | 477.75 (448.04-511.54)<br>[473.83-485.80]                           | 0.110    |
| Sedentary behaviour                                   | 587.55 (531.11-655.92)<br>[574.25-609.07]                           | 588.64 (517.69-660.66)<br>[563.44-607.5]                                          | 578.3 (498.39-658.97)<br>[563.99-592.69]                                       | 566.27 (488.23-630.74)<br>[554.66-579.14]                                 | 580.65 (522.41-637.51)<br>[571.90-588.91]                           | 0.010    |
| Standing                                              | 175.8 (135.46-214.39)<br>[164.84-184.09]                            | 179.74 (142.99-226.68)<br>[170.51-190.38]                                         | 185.04 (142.69-233.08)<br>[176.22-191.66]                                      | 189.99 (145.77-232.89)<br>[180.51-198.49]                                 | 176.68 (145.71-218.82)<br>[171.79-184.74]                           | 0.090    |
| Moving                                                | 66.14 (49.67-84.71)<br>[61.16-70.60]                                | 65.81 (52.03-86.08)<br>[62.78-71.74]                                              | 72.70 (55.21-92.26)<br>[69.29-76.24]                                           | 71.17 (54.61-90.73)<br>[68.51-73.70]                                      | 65.84 (53.14-80.84)<br>[62.99-68.57]                                | <0.001   |
| Walking                                               | 72.81 (54.32-100.48)<br>[68.21-79.72]                               | 76.86 (56.62-100.94)<br>[70.46-81.84]                                             | 82.28 (59.07-107.10)<br>[77.17-87.54]                                          | 88.61 (67.85-114.49)<br>[84.27-93.34]                                     | 83.01 (66.80-102.24)<br>[80.67-86.86]                               | <0.001   |
| Walking slow                                          | 17.59 (11.77-29.67)<br>[16.38-21.35]                                | 17.70 (12-24.92)<br>[15.73-19.08]                                                 | 20.22 (13.18-29.59)<br>[19.19-21.71]                                           | 19.77 (13.61-29.49)<br>[18.73-20.96]                                      | 19.58 (14.12-27.03)<br>[18.59-20.91]                                | 0.017    |
| Walking fast                                          | 48.29 (34.11-66.77)<br>[44.77-52.95]                                | 52.45 (38.57-73.42)<br>[47.30-57.23]                                              | 54.60 (34.87-75.28)<br>[50.71-59.04]                                           | 60.37 (44.84-79.62)<br>[58.25-64.47]                                      | 55.26 (43.84-71.24)<br>[52.96-57.49]                                | <0.001   |
| Climbing stairs (up/down)                             | 3.38 (1.6-5.42)<br>[2.68-3.66]                                      | 3.76 (1.93-5.69)<br>[3.03-4.49]                                                   | 3.57 (1.90-6.01)<br>[3.21-3.90]                                                | 4.90 (2.74-7.53)<br>[4.59-5.29]                                           | 5.21 (3.40-7.74)<br>[4.85-5.64]                                     | <0.001   |
| Number of steps/day                                   | 8324.65<br>(5870.12-11283.67)<br>[7543.00-8788.86]                  | 8566.93<br>(6296.58-11126.36)<br>[7776.40-9314.17]                                | 9169.17<br>(6504.62-11961.15)<br>[8472.17-9603.83]                             | 9993.5<br>(7509.17-12849.67)<br>[9345.67-10558.5]                         | 9501.08<br>(7523.38-11475.29)<br>[9208.00-9975.50]                  | <0.001   |
| LIPA                                                  | 84.73 (67.16-117.85)<br>[79.52-94.73]                               | 87.12 (66.35-109.46)<br>[78.86-91.68]                                             | 95.99 (72.36-118.4)<br>[91.86-100.86]                                          | 95.04 (75.77-116.94)<br>[90.93-97.83]                                     | 85.85 (70.32-107.63)<br>[82.94-91.71]                               | <0.001   |
| Cycling                                               | 0.00 (0.00-8.74)<br>[0.00-0.41]                                     | 0.10 (0.00-7.06)<br>[0.00-1.15]                                                   | 0.00 (0.00-6.59)<br>[0.00-0.15]                                                | 2.05 (0.00-11.71)<br>[0.65-3.26]                                          | 5.53 (0.07-17.07)<br>[4.01-7.31]                                    | <0.001   |
| Cycling, among those cycling >0 min/day<br>Prevalence | 10.03 (2.52-19.57)<br>[6.95-14.96]<br>46.84%                        | 6.41 (1.77-19.83)<br>[3.87-12.71]<br>52.81%                                       | 6.91 (1.88-15.43)<br>[4.71-8.28]<br>49.17%                                     | 7.29 (2.45-16.47)<br>[5.54-9.82]<br>64.92%                                | 9.59 (3.08-20.25)<br>[8.41-11.93]<br>76.87%                         | 0.031    |
| Running                                               | 0.09 (0.03-0.28)<br>[0.06-0.11]                                     | 0.10 (0.02-0.21)<br>[0.07-0.12]                                                   | 0.08 (0.02-0.28)<br>[0.07-0.10]                                                | 0.13 (0.05-0.46)<br>[0.11-0.17]                                           | 0.23 (0.07-1.53)<br>[0.18-0.29]                                     | <0.001   |
| Running, among those running >10 s/day<br>Prevalence  | 0.80 (0.30-3.53)<br>[0.50-2.12]<br>33.16%                           | 0.41 (0.21-1.08)<br>[0.25-0.70]<br>34.83%                                         | 0.48 (0.27-2.42)<br>[0.39-0.67]<br>35.93%                                      | 0.61 (0.27-3.95)<br>[0.44-0.95]<br>45.11%                                 | 1.00 (0.31-5.60)<br>[0.60-1.35]<br>57.49%                           | <0.001   |
| MVPA                                                  | 58.87 (39.08-84.12)<br>[53.72-65.76]                                | 66.42 (44.54-87.66)<br>[59.50-71.44]                                              | 66.18 (42.52-90.47)<br>[59.85-70.88]                                           | 77.71 (53.46-98.50)<br>[71.89-80.61]                                      | 75.51 (59.89-94.82)<br>[72.24-77.77]                                | <0.001   |

There were 6 missing values about level of education resulting in data on 1664 participants.  
All estimates are in min/day except for number of steps/day that is presented in number of steps taken per day.  
yrs., years  
*n*, number of observations  
Q1-Q3, first and third quartile  
CI, confidence interval  
*P*, *p*-value from Kruskal-Wallis rank sum test used to test for differences between levels of education.  
Moving consists of small movements without regular walking during a standing posture.  
Walk slow and fast corresponds to walking <100 and ≥100 steps/min, respectively.  
Prevalence refers to the prevalence of cycling >0 min/day and running >10 s/day (on average), respectively.  
s, seconds  
LIPA, light intensity physical activity  
MVPA, moderate-to-vigorous physical activity

**Table A3.4.** Time spent in physical activity types, stationary behaviours and number of steps/day in 1668 adult Copenhageners (Denmark) participating in the fifth examination of the Copenhagen City Heart Study stratified by BMI

| Behaviour, min/day                                       | Normal<br><i>n</i> =814<br>Median (Q1-Q3)<br>[95% CI] | Overweight<br><i>n</i> =620<br>Median (Q1-Q3)<br>[95% CI] | Obese<br><i>n</i> =234<br>Median (Q1-Q3)<br>[95% CI] | <i>P</i> |
|----------------------------------------------------------|-------------------------------------------------------|-----------------------------------------------------------|------------------------------------------------------|----------|
| Time in bed                                              | 477.32 (445.00-514.09)<br>[474.17-481.33]             | 480.83 (445.38-528.54)<br>[475.40-489.33]                 | 491.67 (448.67-524.58)<br>[475.33-499.83]            | 0.150    |
| Sedentary behaviour                                      | 554.96 (486.35-616.00)<br>[543.49-564.62]             | 589.97 (530.28-660.33)<br>[584.23-596.64]                 | 632.33 (551.96-698.99)<br>[620.33-649.09]            | <0.001   |
| Standing                                                 | 198.18 (159.31-238.08)<br>[192.95-202.49]             | 173.76 (134.32-211.25)<br>[168.49-178.19]                 | 153.07 (113.63-193.00)<br>[144.85-160.35]            | <0.001   |
| Moving                                                   | 73.02 (58.73-92.27)<br>[71.46-76.18]                  | 66.83 (51.80-83.99)<br>[64.21-68.71]                      | 57.86 (43.84-76.94)<br>[53.22-61.22]                 | <0.001   |
| Walking                                                  | 87.56 (66.86-110.69)<br>[84.04-90.31]                 | 80.16 (62.36-103.82)<br>[77.20-82.30]                     | 74.72 (52.06-100.20)<br>[65.88-81.47]                | <0.001   |
| Walking slow                                             | 20.42 (13.71-28.7)<br>[19.38-21.22]                   | 19.5 (13.56-28.28)<br>[18.52-20.71]                       | 16.96 (10.65-24.69)<br>[15.78-18.61]                 | 0.001    |
| Walking fast                                             | 58.39 (43.56-76.93)<br>[56.42-60.44]                  | 52.69 (39.13-72.04)<br>[50.85-54.89]                      | 49.11 (32.98-69.97)<br>[44.49-54.91]                 | <0.001   |
| Climbing stairs<br>(up/down)                             | 5.17 (3.12-7.73)<br>[4.86-5.37]                       | 3.82 (2.14-6.34)<br>[3.58-4.17]                           | 3.01 (1.59-4.60)<br>[2.53-3.29]                      | <0.001   |
| Number of steps/day                                      | 9931.48 (7442.83-12582.23)<br>[9529.33-10202.67]      | 8943.33 (6838.35-11608.96)<br>[8539.29-9315.50]           | 8018.10 (5650.33-10970.39)<br>[7238.86-8731.00]      | <0.001   |
| LIPA                                                     | 96.35 (77-118.17)<br>[93.83-98.74]                    | 88.99 (68.37-111.35)<br>[84.79-92.14]                     | 75.60 (57.07-100.40)<br>[70.5-82.04]                 | <0.001   |
| Cycling                                                  | 3.43 (0.00-15.48)<br>[2.54-4.94]                      | 0.11 (0.00-7.09)<br>[0.00-0.44]                           | 0.00 (0.00-5.53)<br>[0.00-0.39]                      | <0.001   |
| Cycling, among those<br>cycling >0 min/day<br>Prevalence | 10.12 (2.64-19.79)<br>[8.77-11.39]<br>69.04%          | 6.35 (2.19-17.04)<br>[5.26-7.70]<br>53.71%                | 6.77 (2.10-13.58)<br>[4.06-8.65]<br>46.58%           | 0.005    |
| Running                                                  | 0.21 (0.07-1.05)<br>[0.19-0.24]                       | 0.09 (0.03-0.28)<br>[0.08-0.10]                           | 0.06 (0.02-0.15)<br>[0.04-0.07]                      | <0.001   |
| Running, among those<br>running >10 s/day<br>Prevalence  | 0.77 (0.28-5.12)<br>[0.60-1.03]<br>55.04%             | 0.52 (0.25-3.01)<br>[0.39-0.80]<br>35.80%                 | 0.35 (0.23-0.94)<br>[0.29-0.51]<br>22.65%            | 0.002    |
| MVPA                                                     | 78.26 (56.57-98.51)<br>[75.28-81.28]                  | 65.77 (46.87-88.86)<br>[62.97-68.73]                      | 59.65 (39.64-80.30)<br>[54.03-64.97]                 | <0.001   |

There were 2 missing values about BMI resulting in data on 1668 participants.

All estimates are in min/day except for number of steps/day that is presented in number of steps taken per day.

BMI, body mass index; WHO's classification: underweight, <18.5 kg/m<sup>2</sup>; normal, 18.5-<25.0 kg/m<sup>2</sup>; overweight, 25.0-<30.0 kg/m<sup>2</sup>; obese, ≥30 kg/m<sup>2</sup>. The underweight category was merged with the normal weight category because of low number of underweight individuals.

*n*, number of observations

Q1-Q3, first and third quartile

CI, confidence interval

*P*, *p*-value from Kruskal-Wallis rank sum test used to test for differences between BMI classes.

Moving consists of small movements without regular walking during a standing posture.

Walk slow and fast corresponds to walking <100 and ≥100 steps/min, respectively.

Prevalence refers to the prevalence of cycling >0 min/day and running >10 s/day (on average), respectively.

s, seconds

LIPA, light intensity physical activity

MVPA, moderate-to-vigorous physical activity
