# Supplementary material for: Time spent cycling, walking, running, standing and sedentary: a cross-sectional analysis of accelerometer-data from 1670 adults in the Copenhagen City Heart Study
Source: Springer Nature journal article supplement (doi:10.1186/s12889-019-7679-z), 2019-10-24
Supplement: MOESM4 [file 17306892]

## Additional file 4

**Table A4.1.** Prevalence of spending time above or below health-related thresholds in physical activity types and stationary behaviours in 1670 adult Copenhageners (Denmark), overall and stratified by sex

| Health-related thresholds                      | Overall<br>N=1670<br>n (%) [95% CI] | Women<br>n=958<br>n (%) [95% CI] | Men<br>n=712<br>n (%) [95% CI] | P      |
|------------------------------------------------|-------------------------------------|----------------------------------|--------------------------------|--------|
| Sedentary behaviour ≥10 h/day                  | 680 (40.72)<br>[38.36-43.12]        | 333 (34.76)<br>[31.76-37.88]     | 347 (48.74)<br>[45.01-52.47]   | <0.001 |
| Sedentary ≥10 h/day & walking fast <30 min/day | 148 (8.86)<br>[7.56-10.35]          | 58 (6.05)<br>[4.67-7.81]         | 90 (12.64)<br>[10.33-15.36]    | <0.001 |
| Standing ≥4 h/day                              | 321 (19.22)<br>[17.37-21.21]        | 225 (23.49)<br>[20.86-26.33]     | 96 (13.48)<br>[11.11-16.26]    | <0.001 |
| Walking ≥1.5 h/day                             | 704 (42.16)<br>[39.78-44.57]        | 417 (43.53)<br>[40.37-46.74]     | 287 (40.31)<br>[36.70-44.03]   | 0.210  |
| Steps/day <5000                                | 160 (9.58)<br>[8.23-11.12]          | 73 (7.62)<br>[6.06-9.53]         | 87 (12.22)<br>[9.95-14.91]     | 0.002  |
| LIPA ≥2 h/day                                  | 323 (19.34)<br>[17.49-21.34]        | 170 (17.75)<br>[15.41-20.35]     | 153 (21.49)<br>[18.56-24.73]   | 0.064  |
| Walking fast ≥30 min/day                       | 1461 (87.49)<br>[85.78-89.01]       | 869 (90.71)<br>[88.65-92.44]     | 592 (83.15)<br>[80.15-85.78]   | <0.001 |
| Cycling ≥15 min/day                            | 329 (19.70)<br>[17.83-21.70]        | 207 (21.61)<br>[19.07-24.38]     | 122 (17.13)<br>[14.48-20.15]   | 0.027  |
| Running ≥20 min/week                           | 221 (13.23)<br>[11.66-14.97]        | 117 (12.21)<br>[10.24-14.49]     | 104 (14.61)<br>[12.14-17.47]   | 0.180  |
| MVPA ≥0.5 h/day                                | 1533 (91.80)<br>[90.35-93.05]       | 894 (93.32)<br>[91.50-94.78]     | 639 (89.75)<br>[87.23-91.83]   | 0.011  |

N/n, number of observations

%, percent of individuals above/below threshold

CI, confidence interval; calculated using *Wilson's score method*

P, p-value from Pearson's Chi-squared test with Yate's continuity correction

Time cut-points (e.g., ≥10 h/day) refer to individuals' mean daily time spent in the activity types.

Walk fast corresponds to walking ≥100 steps/min.

Running ≥20 min/week is based on a daily threshold of ≥2.86 min/day.

**Table A4.2.** Prevalence of spending time above or below health-related thresholds in physical activity types and stationary behaviours in 1670 adult Copenhageners (Denmark) stratified by age

| Health-related thresholds                      | 20-<35 yrs.<br>n=196<br>n (%) [95% CI] | 35-<50 yrs.<br>n=250<br>n (%) [95% CI] | 50-<65 yrs.<br>n=522<br>n (%) [95% CI] | 65-<75 yrs.<br>n=431<br>n (%) [95% CI] | ≥75 yrs.<br>n=271<br>n (%) [95% CI] | P      |
|------------------------------------------------|----------------------------------------|----------------------------------------|----------------------------------------|----------------------------------------|-------------------------------------|--------|
| Sedentary behaviour ≥10 h/day                  | 68 (34.69)<br>[28.14-41.86]            | 86 (34.40)<br>[28.60-40.69]            | 205 (39.27)<br>[35.08-43.62]           | 188 (43.62)<br>[38.90-48.45]           | 133 (49.08)<br>[43.00-55.18]        | 0.002  |
| Sedentary ≥10 h/day & walking fast <30 min/day | 6 (3.06)<br>[1.25-6.85]                | 5 (2.00)<br>[0.74-0.49]                | 19 (3.64)<br>[2.27-5.73]               | 52 (12.06)<br>[9.22-15.61]             | 66 (24.35)<br>[19.46-29.99]         | <0.001 |
| Standing ≥4 h/day                              | 28 (14.29)<br>[9.86-20.16]             | 58 (23.20)<br>[18.22-29.03]            | 113 (21.65)<br>[18.24-25.48]           | 61 (14.15)<br>[11.07-17.89]            | 61 (22.51)<br>[17.77-28.04]         | 0.002  |
| Walking ≥1.5 h/day                             | 73 (37.24)<br>[30.54-44.46]            | 133 (53.20)<br>[46.81-59.49]           | 266 (50.96)<br>[46.58-55.32]           | 170 (39.44)<br>[34.83-44.25]           | 62 (22.88)<br>[18.11-28.43]         | <0.001 |
| Steps/day <5000                                | 9 (4.59)<br>[2.26-8.82]                | 3 (1.20)<br>[0.31-3.76]                | 21 (4.02)<br>[2.57-6.19]               | 46 (10.67)<br>[8.00-14.07]             | 81 (29.89)<br>[24.58-35.78]         | <0.001 |
| LIPA ≥2 h/day                                  | 7 (3.57)<br>[1.57-7.52]                | 51 (20.40)<br>[15.69-26.04]            | 124 (23.75)<br>[20.21-27.69]           | 94 (21.81)<br>[18.06-26.07]            | 47 (17.34)<br>[13.14-22.50]         | <0.001 |
| Walking fast ≥30 min/day                       | 188 (95.92)<br>[91.83-98.09]           | 244 (97.60)<br>[94.60-99.02]           | 496 (95.02)<br>[92.69-96.66]           | 363 (84.22)<br>[80.36-87.46]           | 170 (62.73)<br>[56.65-68.45]        | <0.001 |
| Cycling ≥15 min/day                            | 90 (45.92)<br>[38.84-53.16]            | 64 (25.60)<br>[20.40-31.56]            | 113 (21.65)<br>[18.24-25.48]           | 43 (9.98)<br>[7.39-13.30]              | 19 (7.01)<br>[4.39-10.91]           | <0.001 |
| Running ≥20 min/week                           | 63 (32.14)<br>[25.77-39.23]            | 69 (27.60)<br>[22.24-33.66]            | 73 (13.98)<br>[11.19-17.33]            | 15 (3.48)<br>[2.03-5.80]               | 1 (0.37)<br>[0.02-2.36]             | <0.001 |
| MVPA ≥0.5 h/day                                | 194 (98.98)<br>[95.97-99.82]           | 249 (99.60)<br>[97.44-99.98]           | 510 (97.70)<br>[95.91-98.75]           | 389 (90.26)<br>[86.96-92.81]           | 191 (70.48)<br>[64.60-75.77]        | <0.001 |

yrs., years  
n, number of observations  
%, percent of individuals above/below threshold  
CI, confidence interval; calculated using *Wilson's score method*  
P, p-value from Pearson's Chi-squared test with Yate's continuity correction  
Time cut-points (e.g., ≥10 h/day) refer to individuals' mean daily time spent in the activity types.  
Walk fast corresponds to walking ≥100 steps/min.  
Running ≥20 min/week is based on a daily threshold of ≥2.86 min/day.

**Table A4.3.** Prevalence of spending time above or below health-related thresholds in physical activity types and stationary behaviours in 1664 adult Copenhageners (Denmark) stratified by level of education

| Health-related thresholds                      | No further education<br>n=190<br>n (%) [95% CI] | Short education (≤3 yrs. w. books)<br>n=178<br>n (%) [95% CI] | Vocational education (1-3 yrs.)<br>n=423<br>n (%) [95% CI] | Higher education (≥3 yrs.)<br>n=419<br>n (%) [95% CI] | University education<br>n=454<br>n (%) [95% CI] | P      |
|------------------------------------------------|-------------------------------------------------|---------------------------------------------------------------|------------------------------------------------------------|-------------------------------------------------------|-------------------------------------------------|--------|
| Sedentary behaviour ≥10 h/day                  | 86 (45.26)<br>[38.09-52.63]                     | 80 (44.94)<br>[37.55-52.56]                                   | 177 (41.84)<br>[37.12-46.72]                               | 149 (35.56)<br>[31.01-40.38]                          | 185 (40.75)<br>[36.22-45.44]                    | 0.100  |
| Sedentary ≥10 h/day & walking fast <30 min/day | 27 (14.21)<br>[9.73-20.18]                      | 17 (9.55)<br>[5.83-15.09]                                     | 57 (13.48)<br>[10.44-17.19]                                | 24 (5.73)<br>[3.78-8.52]                              | 23 (5.07)<br>[3.31-7.62]                        | <0.001 |
| Standing ≥4 h/day                              | 30 (15.79)<br>[11.07-21.94]                     | 35 (19.66)<br>[14.25-26.42]                                   | 98 (23.17)<br>[19.29-27.54]                                | 89 (21.24)<br>[17.48-25.54]                           | 68 (14.98)<br>[11.89-18.67]                     | 0.017  |
| Walking ≥1.5 h/day                             | 63 (33.16)<br>[26.61-40.4]                      | 64 (35.96)<br>[29.01-43.52]                                   | 187 (44.21)<br>[39.43-49.09]                               | 205 (48.93)<br>[44.05-53.82]                          | 183 (40.31)<br>[35.79-44.99]                    | 0.001  |
| Steps/day <5000                                | 27 (14.21)<br>[9.73-20.18]                      | 24 (13.48)<br>[9.00-19.6]                                     | 61 (14.42)<br>[11.29-18.22]                                | 23 (5.49)<br>[3.59-8.24]                              | 23 (5.07)<br>[3.31-7.62]                        | <0.001 |
| LIPA ≥2 h/day                                  | 43 (22.63)<br>[17.02-29.37]                     | 29 (16.29)<br>[11.35-22.73]                                   | 103 (24.35)<br>[20.39-28.78]                               | 92 (21.96)<br>[18.15-26.29]                           | 55 (12.11)<br>[9.33-15.56]                      | <0.001 |
| Walking fast ≥30 min/day                       | 153 (80.53)<br>[74.03-85.76]                    | 155 (87.08)<br>[81.04-91.46]                                  | 340 (80.38)<br>[76.2-83.99]                                | 386 (92.12)<br>[89.01-94.44]                          | 423 (93.17)<br>[90.34-95.24]                    | <0.001 |
| Cycling ≥15 min/day                            | 34 (17.89)<br>[12.87-24.25]                     | 32 (17.98)<br>[12.79-24.58]                                   | 53 (12.53)<br>[9.60-16.16]                                 | 77 (18.38)<br>[14.85-22.49]                           | 131 (28.85)<br>[24.77-33.30]                    | <0.001 |
| Running ≥20 min/week                           | 20 (10.53)<br>[6.71-16.00]                      | 10 (5.62)<br>[2.88-10.38]                                     | 37 (8.75)<br>[6.31-11.96]                                  | 56 (13.37)<br>[10.33-17.09]                           | 97 (21.37)<br>[17.74-25.48]                     | <0.001 |
| MVPA ≥0.5 h/day                                | 163 (85.79)<br>[79.82-90.27]                    | 164 (92.13)<br>[86.90-95.47]                                  | 364 (86.05)<br>[82.30-89.14]                               | 400 (95.47)<br>[92.88-97.17]                          | 437 (96.26)<br>[93.95-97.73]                    | <0.001 |

There were 6 missing values resulting in data about level of education on 1664 participants.

Short education corresponds to ≤3 years with books, vocational education to 1-3 years, higher education to ≥3 years and university education to ≥5 years.

yrs., years

n, number of observations

%, percent of individuals above/below threshold

CI, confidence interval; calculated using *Wilson's score method*

P, p-value from Pearson's chi-squared test with Yate's continuity correction

Time cut-points (e.g., ≥10 h/day) refer to individuals' mean daily time spent in the activity types.

Walk fast corresponds to walking ≥100 steps/min.

Running ≥20 min/week is based on a daily threshold of ≥2.86 min/day.

**Table A4.4.** Prevalence of spending time above or below health-related thresholds in physical activity types and stationary behaviours in 1668 adult Copenhageners (Denmark) stratified by BMI

| Health-related thresholds                      | Normal<br>n=814<br>n (%) [95% CI] | Overweight<br>n=620<br>n (%) [95% CI] | Obese<br>n=234<br>n (%) [95% CI] | P      |
|------------------------------------------------|-----------------------------------|---------------------------------------|----------------------------------|--------|
| Sedentary behaviour ≥10 h/day                  | 250 (30.71)<br>[27.58-34.03]      | 283 (45.65)<br>[41.68-49.66]          | 146 (62.39)<br>[55.82-68.56]     | <0.001 |
| Sedentary ≥10 h/day & walking fast <30 min/day | 49 (6.02)<br>[4.53-7.94]          | 62 (10.00)<br>[7.81-12.70]            | 37 (15.81)<br>[11.51-21.27]      | <0.001 |
| Standing ≥4 h/day                              | 198 (24.32)<br>[21.44-27.45]      | 98 (15.81)<br>[13.07-18.97]           | 24 (10.26)<br>[6.81-15.05]       | <0.001 |
| Walking ≥1.5 h/day                             | 382 (46.93)<br>[43.46-50.42]      | 242 (39.03)<br>[35.19-43.01]          | 79 (33.76)<br>[27.81-40.26]      | <0.001 |
| Steps/day <5000                                | 58 (7.13)<br>[5.50-9.17]          | 58 (9.35)<br>[7.23-11.99]             | 44 (18.80)<br>[14.13-24.53]      | <0.001 |
| LIPA ≥2 h/day                                  | 189 (23.22)<br>[20.39-26.3]       | 106 (17.10)<br>[14.26-20.35]          | 28 (11.97)<br>[8.23-16.99]       | <0.001 |
| Walking fast ≥30 min/day                       | 731 (89.80)<br>[87.47-91.75]      | 543 (87.58)<br>[84.66-90.02]          | 185 (79.06)<br>[73.17-83.97]     | <0.001 |
| Cycling ≥15 min/day                            | 212 (26.04)<br>[23.09-29.23]      | 91 (14.68)<br>[12.04-17.77]           | 25 (10.68)<br>[7.17-15.54]       | <0.001 |
| Running ≥20 min/week                           | 155 (19.04)<br>[16.43-21.95]      | 60 (9.68)<br>[7.52-12.35]             | 6 (2.56)<br>[1.05-5.76]          | <0.001 |
| MVPA ≥0.5 h/day                                | 759 (93.24)<br>[91.24-94.83]      | 571 (92.10)<br>[89.61-94.04]          | 201 (85.90)<br>[80.62-89.96]     | 0.001  |

There were 2 missing values resulting in data about BMI on 1668 participants.

BMI, body mass index; WHO's classification: underweight, <18.5 kg/m<sup>2</sup>; normal, 18.5-<25.0 kg/m<sup>2</sup>; overweight, 25.0-<30.0 kg/m<sup>2</sup>; obese, ≥30 kg/m<sup>2</sup>. The underweight category was merged with the normal weight category because of low number of underweight individuals.

n, number of observations

%, percent of individuals above/below threshold

CI, confidence interval; calculated using *Wilson's score method*

P, p-value from Pearson's chi-squared test with Yate's continuity correction

Time cut-points (e.g., ≥10 h/day) refer to individuals' mean daily time spent in the activity types.

Walk fast corresponds to walking ≥100 steps/min.

Running ≥20 min/week is based on a daily threshold of ≥2.86 min/day.
